# Supplementary material for: Investigation of charge transfer models on the evolution of phases in lithium iron phosphate batteries using phase-field simulations
Source: Royal Society of Chemistry journal article supplement (doi:10.1039/d4ta06444e), 2024-12-17
Supplement: d4ta06444e1.pdf [file d4ta06444e1.pdf]

## Supplementary information for

# **Investigation of charge transfer models on the evolution of phases in lithium iron phosphate batteries using phase-field simulations**

Souzan Hammadi,<sup>a</sup> Peter Broqvist,<sup>a</sup> Daniel Brandell<sup>a</sup> and Nana Ofori-Opoku<sup>b</sup>

<sup>a</sup> Department of Chemistry – Ångström Laboratory, Uppsala University, 75121 Uppsala, Sweden

<sup>b</sup> Department of Materials Science and Engineering and Brockhouse Institute for Materials Research, McMaster University, Hamilton, L8S 1L4, Canada

## Stiffness matrix

The elements in the stiffness matrix are,

$$C_{11} = \lambda \frac{1-\nu}{\nu}, \quad C_{12} = \lambda \quad \text{and} \quad C_{44} = \lambda \frac{1-2\nu}{2\nu}. \quad (1)$$

The Lamé constant,  $\lambda$ , is defined using Poisson's ratio,  $\nu$ , and Young's modulus,  $E$ ,

$$\lambda = \frac{E\nu}{((1+\nu)(1-2\nu))}. \quad (2)$$

The stiffness matrix is thus defined as,

$$C_{2D} = \begin{bmatrix} C_{11} & C_{12} & 0 \\ C_{12} & C_{11} & 0 \\ 0 & 0 & C_{44} \end{bmatrix} \quad (3)$$

$$C_{3D} = \begin{bmatrix} C_{11} & C_{12} & C_{12} & 0 & 0 & 0 \\ C_{12} & C_{11} & C_{12} & 0 & 0 & 0 \\ C_{12} & C_{12} & C_{11} & 0 & 0 & 0 \\ 0 & 0 & 0 & C_{44} & 0 & 0 \\ 0 & 0 & 0 & 0 & C_{44} & 0 \\ 0 & 0 & 0 & 0 & 0 & C_{44} \end{bmatrix} \quad (4)$$

## 3D simulations

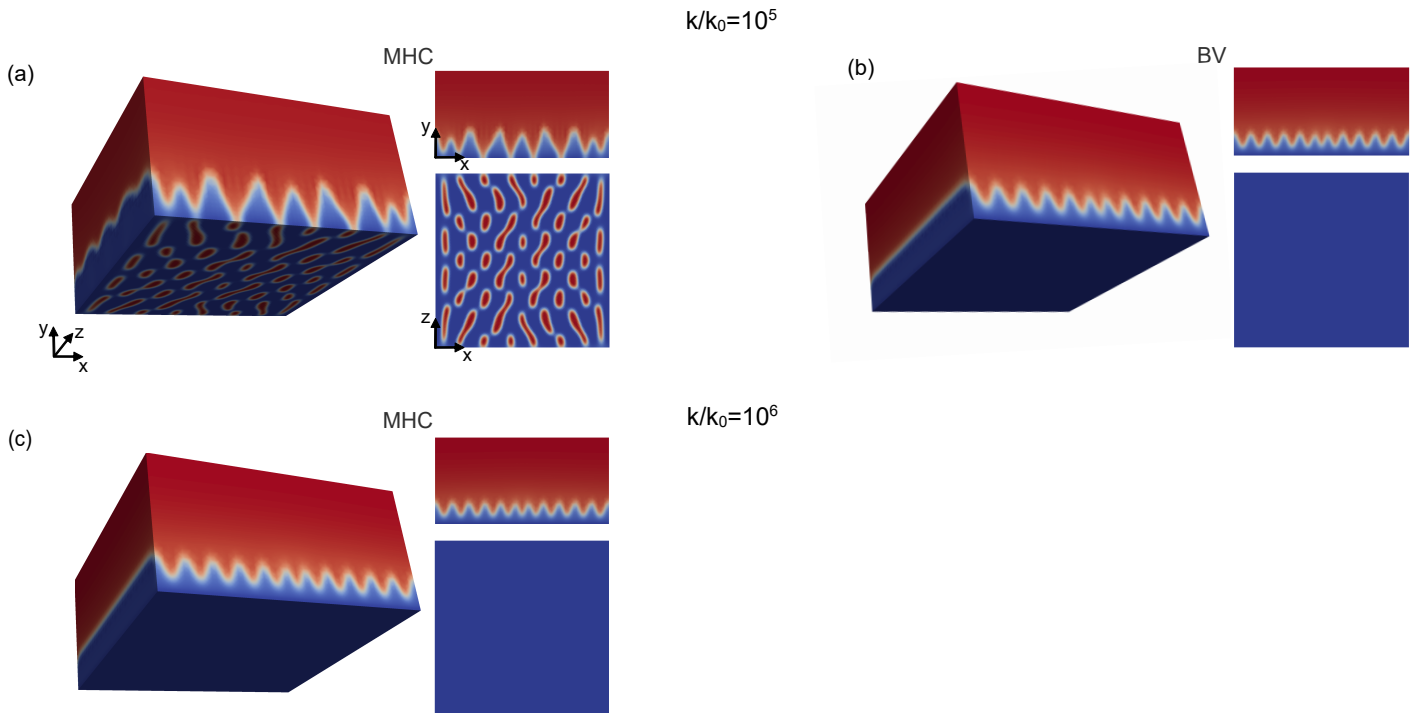

Figure 1 Snapshots of 3D simulations with MHC and BV, at 80 % Li corresponding to Figure 7 in the paper.

# 2D simulations

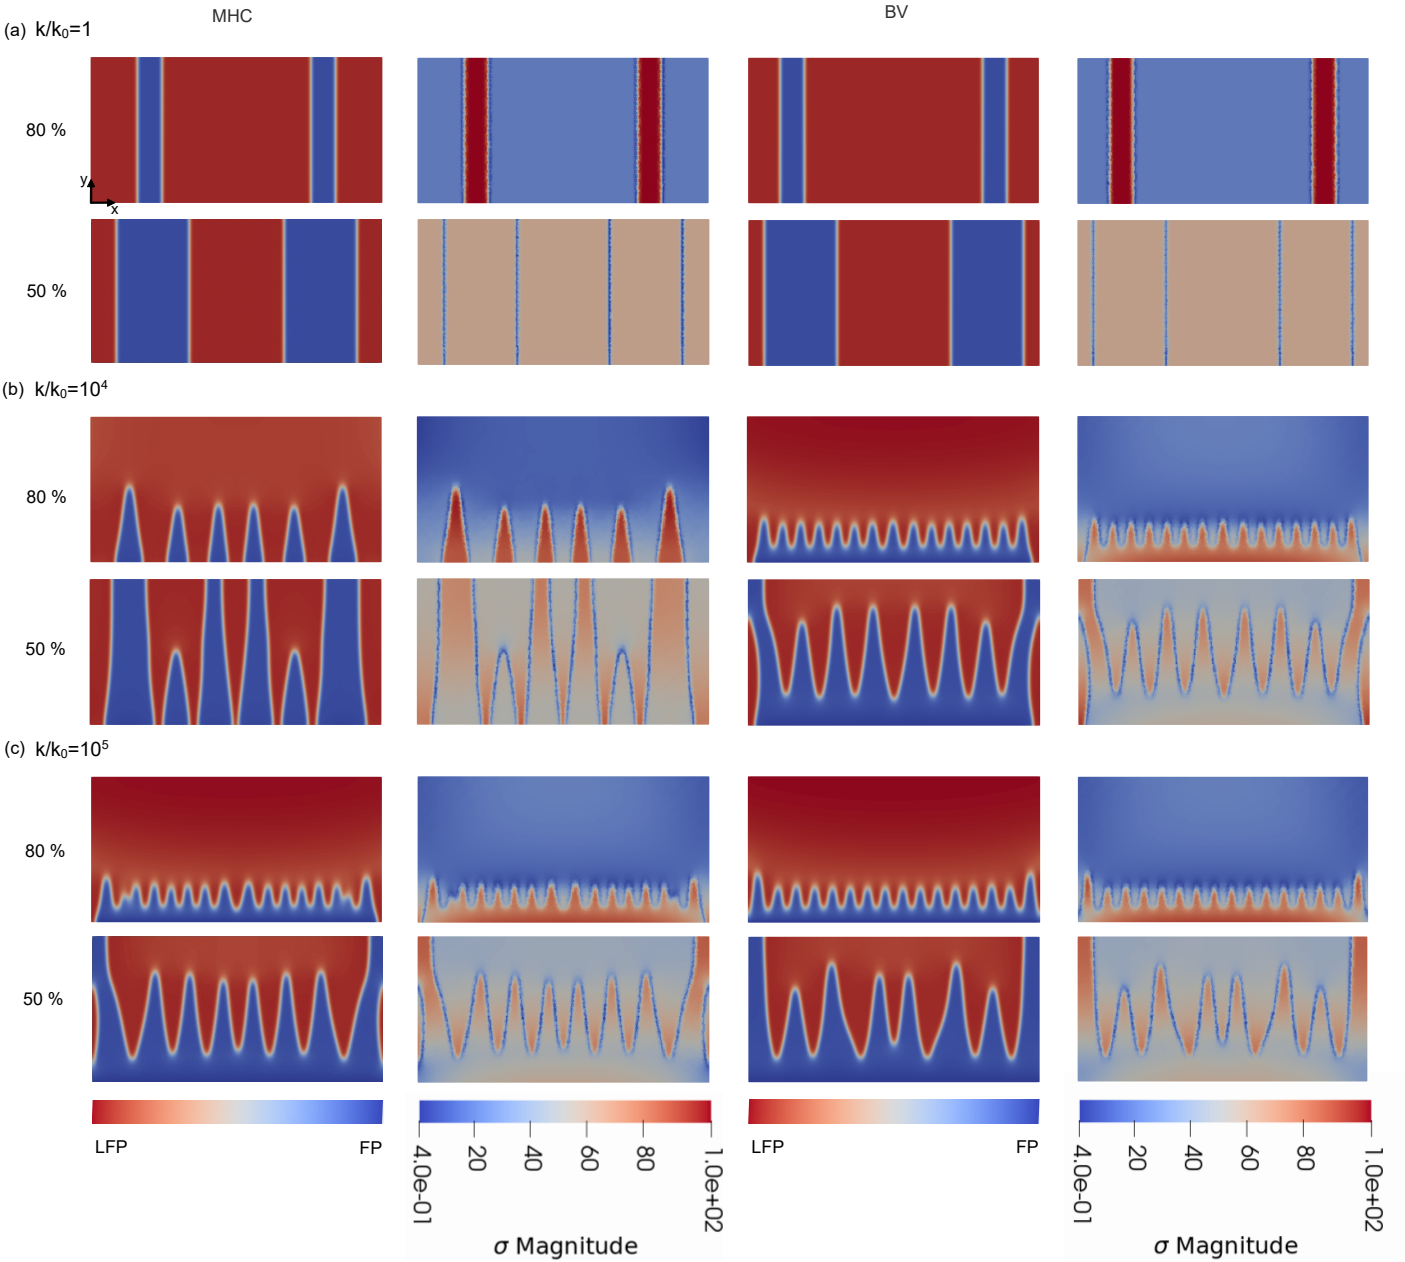

**Figure 2** Snapshots corresponding to the 2D simulations presented in Figure 5 in the paper, at 80 and 50 % Li,  $\Delta\Phi=100$  mV applied potential. Showing the evolution of concentration and stress ( $\sigma$ ) magnitude for simulations using Butler-Volmer and Marcus-Hush-Chidsey charge transfer reaction models.
